# Supplementary material for: Patient-Reported Postoperative Pain and Numbness: Applications for Endoscopic vs. Microscopic Ear Surgery
Source: MDPI journal article supplement (doi:10.3390/jpm12101718), 2022-10-14
Supplement: s1 [file s1]

## Ear Surgery Questionnaire

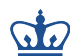

COLUMBIA

OTOLARYNGOLOGY  
HEAD AND NECK SURGERY

What is your age? \_\_\_\_\_

What is your gender?    *Man*    *Woman*    *Other*

What problem are you here for (you may leave blank)? \_\_\_\_\_

Please answer the following questions as accurately as possible:

**Pretend you are a patient who is about to have ear surgery. On a scale from 0 (not important) to 10 (very important), how important are the following to you when you have ear surgery?**

|                                                       | ← <i>Not important</i> <span style="float: right;"><i>Very important</i> →</span> |   |   |   |   |   |   |   |   |   |    |
|-------------------------------------------------------|-----------------------------------------------------------------------------------|---|---|---|---|---|---|---|---|---|----|
| Visibility of the scar                                | 0                                                                                 | 1 | 2 | 3 | 4 | 5 | 6 | 7 | 8 | 9 | 10 |
| Cost of surgery to the hospital (not to you)          | 0                                                                                 | 1 | 2 | 3 | 4 | 5 | 6 | 7 | 8 | 9 | 10 |
| Pain control                                          | 0                                                                                 | 1 | 2 | 3 | 4 | 5 | 6 | 7 | 8 | 9 | 10 |
| Time spent under anesthesia                           | 0                                                                                 | 1 | 2 | 3 | 4 | 5 | 6 | 7 | 8 | 9 | 10 |
| Hearing                                               | 0                                                                                 | 1 | 2 | 3 | 4 | 5 | 6 | 7 | 8 | 9 | 10 |
| An incision hidden in the ear canal (no outside scar) | 0                                                                                 | 1 | 2 | 3 | 4 | 5 | 6 | 7 | 8 | 9 | 10 |
| Not having numbness of your ear                       | 0                                                                                 | 1 | 2 | 3 | 4 | 5 | 6 | 7 | 8 | 9 | 10 |
| Color of the bandage you get after surgery            | 0                                                                                 | 1 | 2 | 3 | 4 | 5 | 6 | 7 | 8 | 9 | 10 |
| Size of the incision                                  | 0                                                                                 | 1 | 2 | 3 | 4 | 5 | 6 | 7 | 8 | 9 | 10 |
| Friendliness of staff                                 | 0                                                                                 | 1 | 2 | 3 | 4 | 5 | 6 | 7 | 8 | 9 | 10 |
