# Supplementary material for: Patient-Reported Postoperative Pain and Numbness: Applications for Endoscopic vs. Microscopic Ear Surgery
Source: MDPI journal article supplement (doi:10.3390/jpm12101718), 2022-10-14
Supplement: s1 [file s1]

## Cuestionario de Cirugía de Orejas

¿Cual es tu edad? \_\_\_\_\_

¿Cuál es su género? Hombre Mujer Otro

¿Para qué problema estás aquí (puedes dejarlo en blanco)?

Por favor responda las siguientes preguntas con la mayor precisión posible:

**Imagina que eres un paciente que está a punto de someterse a una cirugía de oído. En una escala de 0 (no importante) a 10 (muy importante), ¿qué tan importante son para usted las siguientes cosas al someterse a una cirugía de oído?**

|                                                                 | ← No importante <span style="float: right;">Muy importante →</span> |   |   |   |   |   |   |   |   |   |    |
|-----------------------------------------------------------------|---------------------------------------------------------------------|---|---|---|---|---|---|---|---|---|----|
| Visibilidad de la cicatriz                                      | 0                                                                   | 1 | 2 | 3 | 4 | 5 | 6 | 7 | 8 | 9 | 10 |
| Costo de la cirugía en el hospital (no para usted)              | 0                                                                   | 1 | 2 | 3 | 4 | 5 | 6 | 7 | 8 | 9 | 10 |
| Control de dolor                                                | 0                                                                   | 1 | 2 | 3 | 4 | 5 | 6 | 7 | 8 | 9 | 10 |
| Tiempo pasado bajo anestesia                                    | 0                                                                   | 1 | 2 | 3 | 4 | 5 | 6 | 7 | 8 | 9 | 10 |
| Audición                                                        | 0                                                                   | 1 | 2 | 3 | 4 | 5 | 6 | 7 | 8 | 9 | 10 |
| Una incisión oculta en el canal auditivo (sin cicatriz externa) | 0                                                                   | 1 | 2 | 3 | 4 | 5 | 6 | 7 | 8 | 9 | 10 |
| No tener adormecimiento de la oreja                             | 0                                                                   | 1 | 2 | 3 | 4 | 5 | 6 | 7 | 8 | 9 | 10 |
| Color del vendaje que se obtiene después de la cirugía          | 0                                                                   | 1 | 2 | 3 | 4 | 5 | 6 | 7 | 8 | 9 | 10 |
| Tamaño de la incisión                                           | 0                                                                   | 1 | 2 | 3 | 4 | 5 | 6 | 7 | 8 | 9 | 10 |
| Amabilidad del personal                                         | 0                                                                   | 1 | 2 | 3 | 4 | 5 | 6 | 7 | 8 | 9 | 10 |
